# Supplementary material
Source: PubMed Central journal article supplement (PMC5794430)
Supplement: 10.1194_M081455_jlr.M081455-2.pdf [file 10.1194_M081455_jlr.M081455-2.pdf]

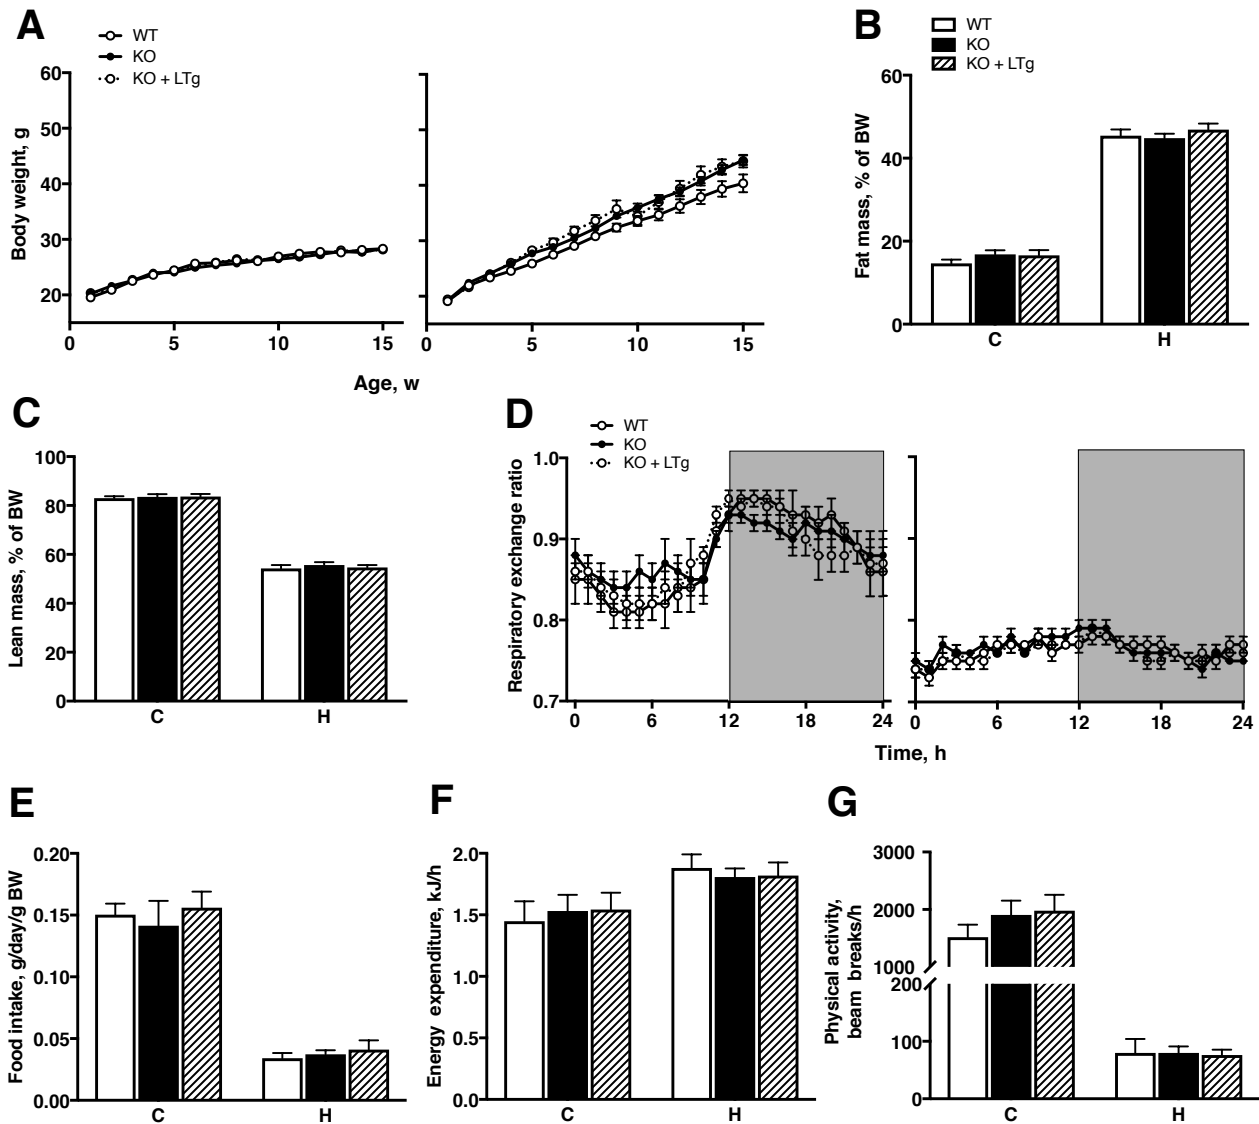

**Supplemental Figure S2. No effect of liver-specific *Them1* expression on body weights, composition, food consumption or energy expenditures.** (A) Body weights were measured in mice fed a chow (left panel) or a high fat diet (right panel) for 14 w (n = 12-16/group). (B) Fat and (C) lean mass were measured at the age of 18 w (n = 7-12/group). In separate experiments, mice were fed chow (C) or a high fat (H) diet for 10 w and then studied in individually housed metabolic cages (n = 6/group). Analyses included (D) respiratory exchange ratios of mice fed chow (left) or a high fat (right) diets, (E) daily food intake, (F) energy expenditure, and (G) physical activity.
